# Supplementary material for: New Insights Into the Evolution of Corticotropin-Releasing Hormone Family With a Special Focus on Teleosts
Source: Front Endocrinol (Lausanne). 2022 Jul 22;13:937218. doi: 10.3389/fendo.2022.937218 (PMC9353778; doi:10.3389/fendo.2022.937218)
Supplement: Supplementary Table 1 — References of crh neuropeptide sequences used for phylogenetic analysis. The table provides the species names, gene prediction/annotation, names, identifiers, and locus references. [file Table_1.xlsx]

## Sheet: Legend
Table S1: References of crh neuropeptide sequences used for phylogenetic analysis. The table provides the species names, gene prediction/annotation, names, identifiers, and locus references.
* Four ucn1 genes were predicted in the genome of the goldfish “Wakin” strain corresponding to two pairs of 4R-cyprinids ucn1aα and β. Goldfish and carp share the same WGD (cyprinid-4R). The doubling of 4R-ucn1 genes may result from assembly artefact and presence of alleles within the present status of the goldfish genome (Chen et al. 2019, doi: 10.1126/sciadv.aav0547).

## Sheet: TableS1
Binomial nomenclature	Species	Gene name	Chromosome	genome reference	Gene locus	Sequence_position	Assembly
Erpetoichthys calabaricus	reedfish	crh1	Chr6	NC_041399.1	114653332		fErpCal1.1 (GCF_900747795.1)
		crh2	Chr10	NC_041403.1	114659260
		ucn1	Chr3	NC_041396.1	114649648
Polyodon spathula	Mississippi paddlefish	crh1-1	Chr3	CM030252		complement(72996045..72996539)	ASM1765450v1
		crh1-2	Chr4	CM030253		complement(23781919..23782419)
		crh2-1	Chr8	CM030257		complement(8827408..8827854)
		crh2-2	Chr23	CM030272		complement(23136500..23136946)
		ucn1-1	Chr5	CM030254		complement(11603390..11603899)
		ucn1-2	Chr6	CM030255		66212378..66212882
Acipenser ruthenus	sterlet sturgeon	crh1-1	Chr3	CM021253	117400473		ASM1064508v1
		crh1-2	Chr4	CM021254	117394966
		crh2-1	Chr28	CM021278	117964412
		crh2-2	Chr244	CM021274		complement(22241617..22242063)
		ucn1-1	Chr5	CM021255		75252225..75252734
		ucn1-2	Chr6	CM021256		72811244..72811747
Lepisosteus oculatus	Spoted gar	crh1	LG9	NC_023187.1	102689609		LepOcu1 (GCF_000242695.1)
		crh2	LG18	NC_023196.1	102698714
		ucn1	LG1	NC_023179.1	102699193	17175050..17175535
Amia calva	bowfin	crh1	Chr3	CM030123		complement(42298878..42299333)	AmiCal1
		crh2	Chr4	CM030124		complement(19118397..19118897)
		ucn1	Chr1	CM030121		36262671..36263180
Anguilla anguilla	European eel	crh1a	Chr4	NC_049204.1	118226241		fAngAng1
		crh1b	Chr8	NC_049208.1	118232761
		crh2	Chr11	NC_049211.1		complement(13738878..13739327)
		ucn1	Chr6	NC_049206.1	118229230
Anguilla japonica	Japanese eel	crh1a	LG4	BEWY01000004.1		complement(11324565..11325059)	Ajp_01
		crh1b	Sc219	BEWY01000219.1		complement(695399..695893)
		crh2	LG6	BEWY01000006.1		24099357..24099806
		ucn1	LG19	BEWY01000019.1		complement(6438558..6439064)
Anguilla rostrata	American eel	crh1a		LTYT01001351		23573..24067	ASM1855537v1.1
		crh1b		LTYT01000493		64693..65187
		crh2		|LTYT01000262		98640..99089
		ucn1		LTYT01004332		66104..66610
Megalops cyprinoides	Indo-Pacific tarpon	crh1a	Chr24	NC_050606.1	118770889		fMegCyp1.pri
		crh1b	Chr2	NC_050584.1	118773184	(370277..3710947)
		crh2	Chr7	NC_050589.1		complement(19277865..19278314)
		ucn1	Chr17	NC_050599.1	uts
Scleropages formosus	arowana (bonytongue)	crh1a	Chr7	NC_041812.1	108937732		fSclFor1.1 (GCF_900964775.1)
		crh1b	Chr9	NC_041814.1	108929616
		crh2 (partial PS)	Chr5	NC_041810.1		7430479..7430634
		ucn1	Chr1	NC_041806.1	108925169
Arapaima gigas	arapaima	crh1a	Sc67	UFQX01000006.1		696783..697196	Agigas_genome_assembly_all_mixed_samples (UFQX00000000.1)
		crh1b	Sc9	UFQX01000107.1		1672863..1673372
		crh2	Sc228	UFQX01000231.1		200466..200942
		ucn1	Sc161	UFQX01001967.1		complement(171023..171493)
Gymnarchus niloticus	aba	crh1a	Sc 633	JAACJT010006334		81833535..81834005	ASM993648v1
		crh1a	Sc345	JAACJT010003456		3687..4181
		crh2	SC434	JAACJT010000434		complement(4747005..4747391)
Paramormyrops kingsleyae	elephant fish	crh1a	Sc418	NW_019715098.1	111861145		PKINGS_0.1 (GCF_002872115.1)
		crh1b	Sc5	NW_019715676.1	111834905
		chr2	Sc54	NW_019715721.1		1888338..1888796
		ucn1	Sc266	NW_019713409.1	111854023
Brevimyrus niger		crh1a	Sc3359	JAABNY010003359		complement(18100..18594)	ASM1516401v1
		crh1b	Sc6343	JAABNY010006343		5647..6117
		crh2	Sc94596	JAABNY010006100		complement(3724..4182)
		ucn1	Sc3056	JAABNY010003056		complement(9466..9963)
Mormyrus iriodes		crh1a	Sc456	JAAGVU010000456		12419..12895	ASM1176352v1
		crh1b	Sc8778	JAAGVU010008778		complement(22581742..22582215)
		ucn1	Sc5421	JAAGVU010005421		complement(16221..16727)
Mormyrus lacerda	western bottlenose mormyrid	crh1a	Sc77778	JAABNX010077778		46315035..46315284	ASM1516399v1
		crh1b	Sc7778	JAABNX010007778		238899005..238899481
		crh2	Sc4565	JAABNX010004565		20577..21035
		ucn1	Sc778	JAABNX010000778		complement(45529164..45529661)
Denticeps clupeoides	denticle herring	crh1a	Chr2	NC_041708.1	114782464		fDenClu1.1
		crh1b	Chr4	NC_041710.1	114789004
		crh2	Chr10	NC_041716.1		4934359..4934739
		ucn1	Chr14	NC_041720.1	114763540
		ucn1		NW_021629847.1	114775937
Clupea harengus	Atlantic herring	crh1a	Sc452	NW_012219470.1	105890062		ASM96633v1 (GCF_000966335.1)
		crh1b	Sc146	NW_012219477.1	105890184
		crh2	Sc622	NW_012222569		1132061..1132522
		ucn1	Sc190	NW_012219847.1	105892959
Alosa sapidissima	American shad	crh1a	Chr19	NC_055975	121692649		fAloSap1
		crh1b	Chr17	NC_055973	121688350
		crh2	Chr7	NC_055963		24501921..24502376
		ucn1	Chr6	NC_055962	121711058
Alosa alosa	Alice shad	crh1a	Chr19	CM030064		834379..834828	AALO_Geno_1.0
		crh1b	Chr16	CM030061	AALO_G00216560
		crh2	Chr4	CM030049		complement(14135155..14135610)
Sardina pilchardus	pilchard	crh1b	Sc34	UIGZ01000034.1		667341..667832	SP_G(UIGZ00000000.1)
		crh2	Sc30	UIGZ01000030.1		1506258..1506713
		ucn1	Sc264	UIGZ01000264.1		complement(443259..443753)
Coilia nasus	anchovy	crh1a	LG1_19	PKFR01000019.1		complement(468147..468314)	knifefish_assembly_2.0
		crh1b	LG5_23	PKFR01000236.1		510621..511112
		ucn1	LG22_14	PKFR01000984.1		225389..225886
		ucn1	LG21_25	PKFR01000948.1		1174592..1175056
Chanos chanos	milkfish	crh1a	Chr5	NC_044499	115812723		fChaCha1.1
		crh1b	Chr3	NC_044497	115807846
		crh2	Chr9	NC_044503		complement(11635223..11635660)
		ucn1	Chr4	NC_044498	115810831
Danio rerio	Zebrafish	crh1a	Chr 2	NC_007113.7	796284		GRCz11 (GCF_000002035.6)
		crh1b	Chr 24	NC_007135.7	492507
		ucn1	Chr20	NC_007131.7	563732
Labeo calbasu	orange-fin labeo	crh1a	scaffold_514881	JAHKKF010514882		67733..68149	ASM1974029v1
		crh1b	scaffold_515337	JAHKKF010515338		complement(20891..21379)
		ucn1	scaffold_514375	JAHKKF010514376		9735..10235
Cyprinus carpio	common carp	crh1aα	ChrA2	NC_056573	109051731		ASM1834038v1
		crh1aβ	ChrB2	NC_056598	109049713
		crh1b	ChrA24	NC_056595	109091272
		ucn1α	ChrA20	NC_056591	109054344
		ucn1β	ChrB20	NC_056616	109053744
Carassius auratus	common goldfish Wakin strain *	crh1a	Chr2	NC_039244	113120597		ASM336829v1
		crh1bβ	Chr49	NC_039291	113066202
		crh1bα	Chr24	NC_039266	113042477
		ucn1aβ2	Sc45831	NW_020526939	113088214
		ucn1aβ1	Chr20	NC_039262	113120425
		ucn1aα2	Sc6182	NW_020523735	113071141
		ucn1aα1	Chr31	NC_039273	113051150
Sinocyclocheilus rhinocerous		crh1aα	Sc1112	NW_015657961	107721759		SAMN03320098_v1.1
		crh1bα	Sc594_5203	NW_015645059	107705203
		crh1bβ	Sc90	NW_015657969	107721935
		ucn1aα	Sc1874	NW_015626862	107716674
		ucn1aβ	Sc185	NW_015662163	ucn
Sinocyclocheilus grahami	golden-line barbel	crh1aα	Sc1120	NW_015506299	107566996		SAMN03320097.WGS_v1.1
		crh1aβ	Sc331	NW_015505510	107602636
		crh1bα	Sc85	NW_015505264	107586798
		crh1bβ	Sc126	NW_015505305	107590339
		ucn1aα	Sc244	NW_015505423	ucn
		ucn1aβ	Sc321	NW_015505500	ucn
Sinocyclocheilus anshuiensis	blind barbine	crh1aα		NW_015536502	107690149		SAMN03320099.WGS_v1.1
		crh1aβ		NW_015537937	107659769
		crh1bβ		NW_015552531	107663627
Gobiocypris rarus	Chinese rare minnow	crh1a	Chr6	CM031761		32162477..32162890	ASM1849164v1
		crh1b	Chr23	CM031778		complement(19124447..19124935)
		ucn1	Chr12	CM031767		28363050..28363487
Megalobrama amblycephala	Blunt Snout Bream	crh1b	LG22	CM032055		complement(13261498..13261986)	ASM1881202v1
		crh1a	LG17	CM032050		11584555..11584971
		ucn1	LG11	CM032044		31981099..31981536
Astyanax mexicanus	Mexican tetra	crh1a	Chr17	NC_035913.1	103031770		Astyanax_mexicanus-2.0 (GCF_000372685.2
		crh1b	Chr3	NC_035899.1	103046053
		crh2	Chr6	NC_035902.1		6999431..6999913
		ucn1	Sc3339	NW_019171399.1	103033702
Pygocentrus nattereri	red-bellied piranha	crh1a	Sc60	NW_016243815.1	108428271		trus_nattereri-1.0.2 (GCF_001682695.1)
		crh1b	Sc8	NW_016243763.1	108438754
		crh2	Sc970	NW_016244725.1	108412506
		ucn1	Sc72	NW_016243827.1	108429317
Ictalurus punctatus	channel catfish	crh1a	Chr20	NC_030435.1	108280206		IpCoco_1.2 (GCF_001660625.1)
		crh1b	Chr23	NC_030438.1	108256093
		ucn1	Chr2	NC_030417.1	108258360
Electrophorus electricus	electric eel	crh1b	Sc80	NW_020826018.1	113573895		fEleEle1.pri
		crh2	Sc199	NW_020826131.1		complement(198406..198795)
		ucn1	Sc18	NW_020825944.1	113571976	complement(1217494..1217991)
Apteronotus leptorhynchus	brown ghost knifefish	crh1b	gb|GBKR010071575.1|
		crh2	gb|GBKR010585227.1
		ucn1	gb|GBKR010309859.1|
Esox lucius	Northern pike	crh1a	LG3 (previously Sc328)	NC_025970.4 (previously NW_013184313_LOC105007404)	105007404		Eluc_v4 (GCF_004634155.1)
		crh1b	LG21	NC_025988.4	105019590
		ucn1	LG18	NC_025985.4	105017760
Salvelinus alpinus	Arctic char	crh1aα	LG32	NC_036871.1	17981896		ASM291031v2 (GCF_002910315.2)
		crh1aβ	LG19	NC_036859.1	23543185
		crh1bα	LG27	NC_036867.1	2147851
		crh1bβ	LG14	NC_036854.1	30238251
		ucn1bα	Sc86	NW_019942515	112068129
		ucn1bβ	LG28	NC_036868.1	15406843
Salmo salar	Atlantic salmon	crh1aα	ssa14	NC_027313	106569042		ICSASG_v2 (GCF_000233375.1)
		crh1aβ	ssa03	NC_027302	100196561
		crh1bα	ssa29	NC_027328	106590389
		crh1bβ	ssa19	NC_027318	106579547
		ucn1bα	ssa06	NC_027305	106607848
		ucn1bβ	ssa15	NC_027314	106571442
Aplochiton taeniatus	“Peladillas”	crh1b	Chr3	JAGFOV010000008		11964860..11965357	fAplTae1
		ucn1	Chr8	JAGFOV010000010		3871975..3872523
Plecoglossus altivelis	Ayu	crh1a	scaffold10	BNHK01000010		complement(3776733..3777233)	GCA_019972215.1
		crh1b	scaffold52	BNHK01000052		503181..503681
		ucn1	scaffold9	BNHK01000009		9527311..9527823
Gadus morhua	Atlantic cod	crh1a	Chr8	NC_044055.1	115549414		gadMor3.0 (GCF_902167405.1)
		crh1b	Chr23	NC_044070.1	115537741
		ucn1	Chr21	NC_044068.1	115534498
Oreochromis niloticus	Nile tilapia	crh1a	LG18	NC_031982.2	100693036		O_niloticus_UMD_NMBU (GCF_001858045.2)
		crh1b	LG9	NC_031974.2	100696611
		ucn1	LG15	NC_031980.2	100702503
Oryzias latipes	Japanese medaka	crh1a	Chr17	NC_019875.2	101166988		ASM223467v1 (GCF_002234675.1)
		crh1b	Chr20	NC_019878.2	100169846
		ucn1	Chr24	NC_019882.2	101175362
Dicentrarchus labrax	European sea-bass	ucn1	LG17	HG916834.1	DLAgn_00073270	complement(21263541..21263978)	seabass_V1.0 (GCA_000689215.1)
		crh1a	ScUN	HG916851.1	DLAgn_00229680	34831503..34831973
		crh1b	LG18-21	HG916835.1	DLAgn_00076040	8096607..8097110
Gasterosteus aculeatus	Three spine stickleback	crh1a	Sc354	AANH01012459		complement(321113..321541)	NID_genomic (GCA_006229165.1)
		crh1b	Sc130	AANH01005775		complement(1245163..1245666)
		ucn1	Sc44128	AANH01007940		complement(3616..3996)
Takifugu rubripes	torafugu	ucn1	Chr16	NC_042300.1	101071454		fTakRub1.2 (GCF_901000725.2)
		crh1b	Chr10	NC_042294.1	101065073
Latimeria chalumnae	Coelacanth	crh1	Sc1957	NW_005820967.1	102361914		LatCha1 (GCF_000225785.1)
		crh2	Sc2926	NW_005821936.1		complement(64081..64526)
		ucn1	Sc509	NW_005819519.1	10235295
Neoceratodus forsteri	Australian lungfish	crh1	Chr7	JADMNL010000007.1		complement(963609576..963609884)	neoFor_v3
		crh2	Chr28	JADMNL010000028.1		complement(130914750..130915214)
		ucn1	Chr4	JADMNL010000004.1		1498108536..1498109057
Protopterus annectens	West African lungfish	crh1	Chr3	CM033080.1		1345928070..1345928567	PAN1.0
		ucn1	Chr6	CM033086.1		complement(40896591..40897109)
Xenopus tropicalis	tropical clawed frog	crh1	Chr6	NC_030682.2	100485597		UCB_Xtro_10.0 (GCF_000004195.4)
		ucn1	Chr5	NC_030681.2	116410818
Rana temporaria	Common frog	crh1	Chr5	LR991684		15238800..15239462	aRanTem1.1
		ucn1	Chr4	LR991683		15238800..15239462
Ambystoma mexicanum	axolotl	chr1	Chr5p	lcl_SuperContig_677		93894..94376	AmbMex60DD
		crh2	Chr3p	lcl_SuperContig_21611		complement(8233..8664)
		ucn1	Chr4p	lcl_SuperContig_294075		complement(18253..18762)
Microcaecilia unicolor		crh1	Chr1	NC_044031	115460378		aMicUni1.1
		crh2	Chr8	NC_044038		complement(196059607..196060035)
		ucn1	Chr3	NC_044033	115464767
Rhinatrema bivittatum		crh1	Chr2	NC_042616.1	115086252	complement(656993844..656994335)	aRhiBiv1.1
		crh2	Chr8	NC_042622.1		complement(7446089..7446424)
		ucn1	Chr3	NC_042617.1	115088645
Gallus gallus	chicken	crh2	Chr20	NC_052551.1	107054855		GCF_016699485.2
		crh1	Chr2	NC_052533.1	404297
		ucn1	Chr3	NC_052534.1	124416946
Lacerta agilis	sand lizard	crh2	Chr6	NC_046317.1		89639158..89639593	rLacAgi1.pri
		crh1	Chr7	NC_046318.1	117050032
		ucn1	Chr3	NC_046314.1	117044764
Homo sapiens	human	crh1	Chr8	NC_000008.11	1392		GRCh38.p13 (GCF_000001405.39)
		ucn1	Chr2	NC_000002.12	7349
Monodelphis domestica	opossum	crh1	Chr3	NC_008803.1	100021527		MonDom5 (GCF_000002295.2)
		crh2	Chr1	NC_008801.1	103098150
		ucn1	Chr1	NC_008801.1	100031077
Tachyglossus aculeatus	Australian echidna	crh1	Chr25	NC_052090		complement(22029725..22030282)	mTacAcu1.pri
		ucn1	Chr9	NC_052074	119932230
Ornithorhynchus anatinus	platypus	crh1	Chr7	NC_041734	100081035		mOrnAna1.pri.v4
		ucn1	Chr9	NC_041736	114814340
		crh2	Chr8	NC_041735	114813704
Callorhinchus milii	elephant shark	crh1	Sc48	NW_006890101.1	103180731		Callorhinchus_milii-6.1.3 (GCF_000165045.1)
		crh2	Sc6	NW_006890059.1	(Grone & Maruska, 2015)	complement(566521..566985)
		ucn1	Sc124	NW_006890177.1	103185796
Leucoraja erinacea	little skate	chr1		AESE010050453		complement (1509..2006)	Leucoraja erinacea (assembly LER_WGS_1)
		ucn1		AESE012607175		60..488
Amblyraja radiata	thorny skate	chr1	Chr4	NC_045959	116971733		sAmbRad1.1.pri
		ucn1	Chr5	NC_045960	116973391
		crh2	Chr23	NC_045978		complement(4657550..4657984)
Scyliorhinus canicula	Catshark	crh1	Chr10	NC_052155	119972580		sScyCan1.1
		crh2	Chr7	NC_052152		172814761..172815202
		ucn1	Chr6	NC_052151	119966827
Rhincodon typus	Whale shark	crh1		NW_018077661.1	109936883		ASM164234v2 (GCF_001642345.1)
		crh2		NW_018046791.1		76720..77163
		ucn1		NW_018059943.1	109929110
Scyliorhinus torazame	Cloudy catshark	crh1		BFAA01002022.1		complement(415168..415644)	Storazame_v1.0 (BFAA00000000.1)
		crh2		BFAA01000670.1		complement(341033..341473)
		ucn1-1		BFAA01018865.1		complement(10903..11413)
		ucn1-2		BFAA01007190.1		complement(12357..12827)
Carcharodon carcharias	white shark	crh1	Chr6	NC_054472	121279194		sCarCar2.pri
		crh2	Chr14	NC_054480		complement(38311105..38311545)
		ucn1	Chr5	NC_054471	121278365
Petromyzon marinus	sea lamprey		Chr12	NC_046080.1	116941573		kPetMar1.pri
			Chr3	NC_046071.1	116953037
			Chr15	NC_046083.1	116942592
